# Supplementary material for: Sustainable recovery of pure natural vanillin from fermentation media in a single pervaporation step
Source: Royal Society of Chemistry journal article supplement (doi:10.1039/c1gc15308k), 2011-01-01
Supplement: c1gc15308k.pdf [file c1gc15308k.pdf]

## **Supplementary information for**

### **Sustainable Recovery of Pure Natural Vanillin from Fermentation Media in a Single Pervaporation Step**

Carla Brazinha<sup>a</sup>, Dalje S. Barbosa<sup>b</sup> and João G. Crespo<sup>\*a</sup>

<sup>a</sup>) REQUIMTE/CQFB, Departamento de Química, FCT, Universidade Nova de Lisboa, 2829-516 Caparica, Portugal.

<sup>b</sup>) Department of Chemical Engineering, University of Murcia, Campus de Espinardo, 30071 Murcia, Spain.

\*corresponding author

### **Index**

**Figure 1:** Calibration curve of vanillin with different standards of aqueous solutions of vanillin, obtained in a UV spectrophotometer (Helios  $\alpha$ , ThermoSpectronic, UK) at 280 nm.

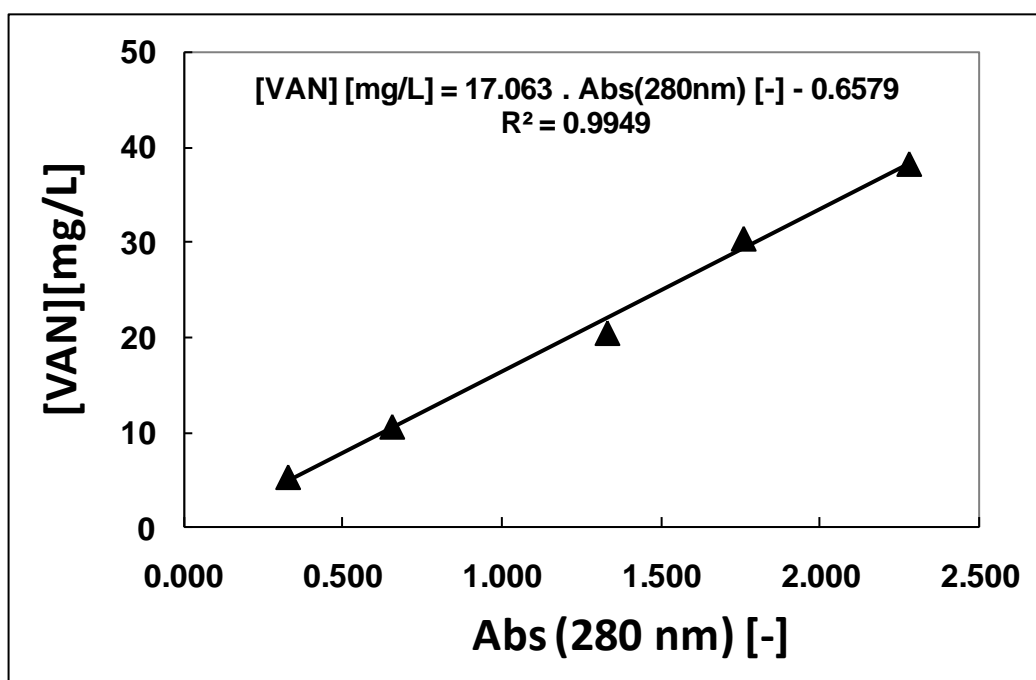

**Figure 1:** Calibration curve of vanillin with different standards of aqueous solutions of vanillin, obtained in a UV spectrophotometer (Helios  $\alpha$ , ThermoSpectronic, UK) at 280 nm.
